# Supplementary material for: Transcriptome Analysis of Sexually Dimorphic Chinese White Wax Scale Insects Reveals Key Differences in Developmental Programs and Transcription Factor Expression
Source: PubMed Central journal article supplement (PMC4311254; doi:10.1038/srep08141), 2015-01-30
Supplement: srep08141-s1.pdf [file srep08141-s1.pdf]

**Transcriptome Analysis of Sexually Dimorphic Chinese White Wax Scale Insect  
Reveals Key Differences in Developmental Programs and Transcription Factor  
Expression**

Pu Yang<sup>a</sup>, Xiao-Ming Chen<sup>b\*</sup>, Wei-Wei Liu<sup>c</sup>, Ying Feng<sup>d</sup>, Tao Sun<sup>e</sup>

Research Institute of Resources Insects, Chinese Academy of Forestry, Key

Laboratory of Cultivating and Utilization of Resources Insects of State Forestry

Administration, Kunming, 650224, China

Email correspondence: <sup>a</sup>[zjuyangpu@aliyun.com](mailto:zjuyangpu@aliyun.com), <sup>b</sup>[cafchxm@tom.com](mailto:cafchxm@tom.com),

<sup>c</sup>[ypu910@126.com](mailto:ypu910@126.com), <sup>d</sup>[iugogo@126.com](mailto:iugogo@126.com), <sup>e</sup>[13033334807@163.com](mailto:13033334807@163.com).

\*Corresponding Authors:

Dr. Xiao-Ming Chen

Research Institute of Resources Insects

Chinese Academy of Forestry

Kunming, 650224, China

Phone: 86-871-63860019

Fax: 86-871-63860019

Email: [cafchxm@tom.com](mailto:cafchxm@tom.com)

## SUPPORTING INFORMATION

### TABLES

**Table S1. Alignment statistics for the ten RNA-Seq libraries.**

**Table S2. GO classification of the DEGs in each pairwise comparison.**

**Table S3. KO classification of the DEGs in each pairwise comparison.**

**Table S4. Expression levels of genes at different developmental stages of *Ericerus***

*pela*. The expression level is indicated by the RPKM value. To validate gene expression, certain gene expression levels were also presented as copy numbers obtained by qRT-PCR.
